# Supplementary material for: Knowledge and Attitudes of Guam Residents towards Cancer Clinical Trial Participation
Source: MDPI journal article supplement (doi:10.3390/ijerph192315917), 2022-11-29
Supplement: s1 [file s1]

Supplementary Table S2. Crude Odds Ratio and 95% Confidence Interval of Univariate Logistic Regressions

| Variable                                           | Knowledge 1: Have you heard of the term ‘clinical trial’? | Knowledge 3. Does taking part in a clinical trial mean you might not receive the treatment being tested? | Knowledge 4. In a clinical trial, the sponsor pays for the new drug being tested while all other costs are billed to your insurance company | Attitude 13. Do you think you would receive good quality treatment from a clinical trial offered in Guam? | Attitude 14. Do you think that people who take part in cancer clinical trials are treated like 'guinea pigs'? | Attitude 17. Do you think you would have to pay more out-of-pocket expenses if you took part in a clinical trial in Guam? | Attitude 20. If you had cancer, would the doctor’s ethnicity be important in you decision to take part in a cancer clinical trial? | Attitude 22. If your doctor gave you advice that goes against your cultural beliefs, would you listen to them? | Attitude 25. How important is the support of your religious community if you decided to take part in a cancer clinical trial? | Attitude 26. If you had cancer, would you seek traditional healing practices? | Attitude 27. Have you ever gone to a <i>suruhano</i> for health care? | Attitude 29. If you had cancer, would you seek treatment by a <i>suruhano</i> ? |
|----------------------------------------------------|-----------------------------------------------------------|----------------------------------------------------------------------------------------------------------|---------------------------------------------------------------------------------------------------------------------------------------------|-----------------------------------------------------------------------------------------------------------|---------------------------------------------------------------------------------------------------------------|---------------------------------------------------------------------------------------------------------------------------|------------------------------------------------------------------------------------------------------------------------------------|----------------------------------------------------------------------------------------------------------------|-------------------------------------------------------------------------------------------------------------------------------|-------------------------------------------------------------------------------|-----------------------------------------------------------------------|---------------------------------------------------------------------------------|
| Age                                                | 0.99 (0.96-1.01)                                          | 0.98 (0.95-1.00)                                                                                         | 1.00 (0.98-1.03)                                                                                                                            | 1.02 (0.99-1.04)                                                                                          | 0.99 (0.97-1.02)                                                                                              | 0.99 (0.97-1.02)                                                                                                          | 1.02 (0.99-1.04)                                                                                                                   | 1.01 (0.98-1.03)                                                                                               | 1.00 (0.98-1.03)                                                                                                              | 0.99 (0.97-1.02)                                                              | 1.02 (0.99-1.04)                                                      | 0.97 (0.95-0.99)*                                                               |
| Gender (Ref: Male)                                 |                                                           |                                                                                                          |                                                                                                                                             |                                                                                                           |                                                                                                               |                                                                                                                           |                                                                                                                                    |                                                                                                                |                                                                                                                               |                                                                               |                                                                       |                                                                                 |
| <i>Female</i>                                      | 1.32 (0.69-2.53)                                          | 0.83 (0.41-1.66)                                                                                         | 0.82 (0.42-1.62)                                                                                                                            | 1.32 (0.69-2.53)                                                                                          | 0.97 (0.50-1.90)                                                                                              | 1.49 (0.78-2.84)                                                                                                          | 0.69 (0.34-1.37)                                                                                                                   | 0.55 (0.28-1.08)                                                                                               | 0.83 (0.44-1.57)                                                                                                              | 1.75 (0.88-3.46)                                                              | 1.73 (0.90-3.34)                                                      | 1.01 (0.52-1.95)                                                                |
| Ethnicity (Ref: White)                             |                                                           |                                                                                                          |                                                                                                                                             |                                                                                                           |                                                                                                               |                                                                                                                           |                                                                                                                                    |                                                                                                                |                                                                                                                               |                                                                               |                                                                       |                                                                                 |
| <i>Chamorro</i>                                    | 0.18 (0.04-0.86)*                                         | 0.45 (0.12-1.71)                                                                                         | 0.88 (0.27-2.82)                                                                                                                            | 0.72 (0.23-2.28)                                                                                          | 1.96 (0.51-7.54)                                                                                              | 5.34 (1.68-17.00)**                                                                                                       | 300000.00 (0.00-****)                                                                                                              | 0.64 (0.20-2.01)                                                                                               | 27.70 (3.47-221.00)**                                                                                                         | 1.14 (0.37-3.46)                                                              | 10.20 (2.18-48.20)**                                                  | 2.08 (0.66-6.53)                                                                |
| <i>Filipino</i>                                    | 0.09 (0.02-0.44)**                                        | 0.36 (0.09-1.45)                                                                                         | 2.17 (0.65-7.31)                                                                                                                            | 0.56 (0.17-1.90)                                                                                          | 4.22 (1.05-17.00)*                                                                                            | 2.40 (0.71-8.07)                                                                                                          | 500000.00 (0.00-****)                                                                                                              | 0.63 (0.18-2.12)                                                                                               | 42.20 (4.98-357.0)**                                                                                                          | 1.13 (0.34-3.74)                                                              | 3.61 (0.72-18.20)                                                     | 0.80 (0.23-2.83)                                                                |
| <i>Other</i>                                       | 0.38 (0.07-2.16)                                          | 1.02 (0.20-5.29)                                                                                         | 1.05 (0.27-4.13)                                                                                                                            | 0.32 (0.08-1.21)                                                                                          | 3.59 (0.81-16.00)                                                                                             | 2.20 (0.58-8.28)                                                                                                          | 290000.00 (0.00-****)                                                                                                              | 1.18 (0.29-4.78)                                                                                               | 8.53 (0.95-76.60)                                                                                                             | 1.02 (0.27-3.80)                                                              | 2.65 (0.46-15.10)                                                     | 1.54 (0.40-5.88)                                                                |
| Marital Status (Ref: Married/Living as Married)    |                                                           |                                                                                                          |                                                                                                                                             |                                                                                                           |                                                                                                               |                                                                                                                           |                                                                                                                                    |                                                                                                                |                                                                                                                               |                                                                               |                                                                       |                                                                                 |
| <i>Single</i>                                      | 0.75 (0.35-1.60)                                          | 0.79 (0.35-1.81)                                                                                         | 0.87 (0.39-1.96)                                                                                                                            | 0.41 (0.19-0.89)*                                                                                         | 1.00 (0.46-2.19)                                                                                              | 1.64 (0.76-3.54)                                                                                                          | 1.02 (0.45-2.29)                                                                                                                   | 0.80 (0.37-1.73)                                                                                               | 1.34 (0.63-2.89)                                                                                                              | 0.56 (0.25-1.25)                                                              | 0.89 (0.41-1.91)                                                      | 0.74 (0.34-1.63)                                                                |
| <i>Divorced/widowed/separated</i>                  | 0.88 (0.32-2.41)                                          | 0.39 (0.14-1.08)                                                                                         | 1.15 (0.41-3.21)                                                                                                                            | 1.16 (0.40-3.33)                                                                                          | 0.64 (0.21-1.93)                                                                                              | 1.26 (0.46-3.42)                                                                                                          | 1.06 (0.36-3.06)                                                                                                                   | 1.21 (0.42-3.49)                                                                                               | 0.61 (0.22-1.66)                                                                                                              | 0.32 (0.12-0.88)*                                                             | 1.03 (0.38-2.81)                                                      | 0.87 (0.31-2.41)                                                                |
| Education (Ref: ≤High school graduate)             |                                                           |                                                                                                          |                                                                                                                                             |                                                                                                           |                                                                                                               |                                                                                                                           |                                                                                                                                    |                                                                                                                |                                                                                                                               |                                                                               |                                                                       |                                                                                 |
| <i>Some college or technical school</i>            | 2.14 (0.79-5.80)                                          | 0.94 (0.35-2.58)                                                                                         | 0.93 (0.35-2.49)                                                                                                                            | 1.67 (0.61-4.61)                                                                                          | 0.72 (0.25-2.06)                                                                                              | 0.96 (0.34-2.70)                                                                                                          | 0.31 (0.10-0.96)*                                                                                                                  | 3.42 (1.17-10.00)*                                                                                             | 0.94 (0.35-2.58)                                                                                                              | 0.79 (0.29-2.13)                                                              | 0.70 (0.25-1.92)                                                      | 0.27 (0.08-0.92)*                                                               |
| <i>≥College graduate</i>                           | 5.04 (2.34-10.90)***                                      | 2.34 (1.06-5.19)*                                                                                        | 0.34 (0.16-0.74)**                                                                                                                          | 1.52 (0.74-3.12)                                                                                          | 0.91 (0.44-1.90)                                                                                              | 0.45 (0.22-0.93)*                                                                                                         | 0.31 (0.15-0.68)**                                                                                                                 | 3.20 (1.52-6.75)**                                                                                             | 0.56 (0.27-1.15)                                                                                                              | 1.72 (0.80-3.69)                                                              | 0.96 (0.47-1.97)                                                      | 0.91 (0.44-1.86)                                                                |
| Personal Income (Ref: <\$50,000)                   |                                                           |                                                                                                          |                                                                                                                                             |                                                                                                           |                                                                                                               |                                                                                                                           |                                                                                                                                    |                                                                                                                |                                                                                                                               |                                                                               |                                                                       |                                                                                 |
| <i>\$50,000 or more</i>                            | 2.44 (1.18-5.02)*                                         | 1.79 (0.83-3.84)                                                                                         | 0.77 (0.37-1.62)                                                                                                                            | 2.44 (1.18-5.02)*                                                                                         | 0.60 (0.29-1.22)                                                                                              | 0.52 (0.26-1.03)                                                                                                          | 0.34 (0.16-0.75)**                                                                                                                 | 1.67 (0.82-3.40)                                                                                               | 0.65 (0.33-1.28)                                                                                                              | 1.35 (0.65-2.80)                                                              | 1.40 (0.70-2.80)                                                      | 1.57 (0.78-3.18)                                                                |
| <i>Refused</i>                                     | 0.50 (0.17-1.50)                                          | 0.74 (0.25-2.19)                                                                                         | 2.30 (0.79-6.70)                                                                                                                            | 0.82 (0.28-2.36)                                                                                          | 0.29 (0.08-1.10)                                                                                              | 0.84 (0.29-2.46)                                                                                                          | 0.60 (0.19-1.87)                                                                                                                   | 1.35 (0.45-4.06)                                                                                               | 2.40 (0.71-8.07)                                                                                                              | 1.01 (0.34-3.06)                                                              | 1.19 (0.41-3.50)                                                      | 2.45 (0.84-7.15)                                                                |
| Born Country (Ref: USA)                            |                                                           |                                                                                                          |                                                                                                                                             |                                                                                                           |                                                                                                               |                                                                                                                           |                                                                                                                                    |                                                                                                                |                                                                                                                               |                                                                               |                                                                       |                                                                                 |
| <i>Guam</i>                                        | 0.50 (0.18-1.40)                                          | 0.89 (0.33-2.41)                                                                                         | 1.13 (0.41-3.06)                                                                                                                            | 0.67 (0.26-1.73)                                                                                          | 1.86 (0.62-5.54)                                                                                              | 2.84 (1.13-7.14)*                                                                                                         | 2.28 (0.70-7.40)                                                                                                                   | 0.60 (0.23-1.54)                                                                                               | 5.29 (1.90-14.70)**                                                                                                           | 1.00 (0.38-2.64)                                                              | 7.80 (2.45-24.90)**                                                   | 1.13 (0.45-2.81)                                                                |
| <i>Philippines</i>                                 | 0.18 (0.06-0.57)**                                        | 0.81 (0.26-2.55)                                                                                         | 2.39 (0.79-7.27)                                                                                                                            | 0.57 (0.19-1.69)                                                                                          | 6.14 (1.84-20.50)**                                                                                           | 1.81 (0.63-5.19)                                                                                                          | 3.76 (1.05-13.50)*                                                                                                                 | 0.74 (0.25-2.22)                                                                                               | 7.33 (2.25-23.90)**                                                                                                           | 0.65 (0.22-1.93)                                                              | 2.15 (0.58-8.01)                                                      | 0.45 (0.14-1.42)                                                                |
| <i>Other</i>                                       | 0.50 (0.13-1.95)                                          | 1.11 (0.27-4.60)                                                                                         | 1.23 (0.31-4.84)                                                                                                                            | 0.57 (0.16-2.08)                                                                                          | 2.52 (0.62-10.30)                                                                                             | 2.06 (0.58-7.29)                                                                                                          | 3.30 (0.76-14.30)                                                                                                                  | 1.93 (0.43-8.69)                                                                                               | 2.59 (0.68-9.95)                                                                                                              | 0.98 (0.25-3.76)                                                              | 1.83 (0.39-8.67)                                                      | 1.60 (0.45-5.63)                                                                |
| Employment Status (Ref: Employed)                  |                                                           |                                                                                                          |                                                                                                                                             |                                                                                                           |                                                                                                               |                                                                                                                           |                                                                                                                                    |                                                                                                                |                                                                                                                               |                                                                               |                                                                       |                                                                                 |
| <i>Retired</i>                                     | 0.70 (0.29-1.71)                                          | 0.37 (0.15-0.93)*                                                                                        | 1.46 (0.58-3.70)                                                                                                                            | 1.60 (0.63-4.04)                                                                                          | 1.85 (0.77-4.45)                                                                                              | 1.20 (0.50-2.88)                                                                                                          | 0.96 (0.36-2.56)                                                                                                                   | 0.89 (0.35-2.22)                                                                                               | 1.07 (0.45-2.56)                                                                                                              | 0.52 (0.21-1.28)                                                              | 0.92 (0.38-2.25)                                                      | 0.63 (0.25-1.59)                                                                |
| <i>Unemployed/student/homemaker/unable to work</i> | 0.34 (0.15-0.80)*                                         | 0.35 (0.15-0.85)*                                                                                        | 3.15 (1.35-7.38)**                                                                                                                          | 0.93 (0.40-2.13)                                                                                          | 0.56 (0.22-1.45)                                                                                              | 1.52 (0.65-3.54)                                                                                                          | 2.00 (0.85-4.69)                                                                                                                   | 0.41 (0.18-0.95)*                                                                                              | 1.59 (0.68-3.70)                                                                                                              | 0.57 (0.24-1.35)                                                              | 1.29 (0.56-2.95)                                                      | 0.71 (0.30-1.67)                                                                |
| English Fluency (Ref: Not well):                   |                                                           |                                                                                                          |                                                                                                                                             |                                                                                                           |                                                                                                               |                                                                                                                           |                                                                                                                                    |                                                                                                                |                                                                                                                               |                                                                               |                                                                       |                                                                                 |
| <i>Well</i>                                        | 9.57 (2.04-44.90)**                                       | 1.08 (0.31-3.70)                                                                                         | 0.07 (0.02-0.34)**                                                                                                                          | 1.32 (0.42-4.13)                                                                                          | 0.61 (0.19-1.92)                                                                                              | 3.16 (0.93-10.80)                                                                                                         | 0.24 (0.07-0.78)*                                                                                                                  | 1.09 (0.34-3.50)                                                                                               | NA                                                                                                                            | 0.35 (0.07-1.64)                                                              | 0.81 (0.26-2.53)                                                      | 2.17 (0.57-8.24)                                                                |
| <i>Speaking Other Language</i>                     | 0.27 (0.12-0.61)**                                        | 0.87 (0.40-1.90)                                                                                         | 2.45 (1.07-5.63)*                                                                                                                           | 1.06 (0.52-2.16)                                                                                          | 1.97 (0.90-4.32)                                                                                              | 1.41 (0.70-2.85)                                                                                                          | 3.84 (1.49-9.89)**                                                                                                                 | 0.47 (0.21-1.03)                                                                                               | 2.52 (1.22-5.18)*                                                                                                             | 0.82 (0.38-1.75)                                                              | 1.77 (0.85-3.72)                                                      | 1.10 (0.53-2.29)                                                                |
| Insurance (Ref: Private)                           |                                                           |                                                                                                          |                                                                                                                                             |                                                                                                           |                                                                                                               |                                                                                                                           |                                                                                                                                    |                                                                                                                |                                                                                                                               |                                                                               |                                                                       |                                                                                 |
| <i>Public (Medicare, Medicaid, military)</i>       | 0.45 (0.21-0.98)*                                         | 0.59 (0.26-1.36)                                                                                         | 5.23 (2.27-12.0)***                                                                                                                         | 0.69 (0.32-1.49)                                                                                          | 0.76 (0.34-1.70)                                                                                              | 1.18 (0.55-2.51)                                                                                                          | 1.78 (0.78-4.03)                                                                                                                   | 0.56 (0.26-1.21)                                                                                               | 1.95 (0.90-4.22)                                                                                                              | 1.01 (0.45-2.29)                                                              | 1.03 (0.49-2.20)                                                      | 0.75 (0.34-1.63)                                                                |
| <i>No insurance</i>                                | 0.24 (0.08-0.68)**                                        | 0.26 (0.09-0.72)*                                                                                        | 6.51 (2.24-18.9)**                                                                                                                          | 0.57 (0.21-1.54)                                                                                          | 1.60 (0.59-4.35)                                                                                              | 0.97 (0.36-2.61)                                                                                                          | 3.67 (1.31-10.30)*                                                                                                                 | 1.28 (0.42-3.92)                                                                                               | 1.44 (0.53-3.93)                                                                                                              | 0.48 (0.18-1.32)                                                              | 0.24 (0.06-0.87)*                                                     | 0.50 (0.16-1.50)                                                                |
| Have Religion                                      | 0.47 (0.19-1.15)                                          | 0.69 (0.27-1.74)                                                                                         | 0.92 (0.39-2.15)                                                                                                                            | 1.51 (0.67-3.41)                                                                                          | 1.02 (0.44-2.39)                                                                                              | 1.46 (0.65-3.29)                                                                                                          | 1.51 (0.60-3.84)                                                                                                                   | 0.38 (0.14-1.00)                                                                                               | NA                                                                                                                            | 1.32 (0.57-3.05)                                                              | 5.57 (1.83-17.00)**                                                   | 1.01 (0.44-2.33)                                                                |

NA = Non available due to zero in a cell. \*P<0.05. \*\*P<0.01. \*\*\*P<0.001.
