# Supplementary material for: Knowledge and Attitudes of Guam Residents towards Cancer Clinical Trial Participation
Source: MDPI journal article supplement (doi:10.3390/ijerph192315917), 2022-11-29
Supplement: s1 [file s1]

Supplementary Table S1: Knowledge and Attitude Survey Questions

| Type        | Question                                                                                                                                                                               |
|-------------|----------------------------------------------------------------------------------------------------------------------------------------------------------------------------------------|
| Knowledge 1 | Have you heard of the term 'clinical trial'?                                                                                                                                           |
| Knowledge 2 | Do you agree or disagree with the following statement? "Clinical trials test how safe and useful a new drug is against cancer and other diseases".                                     |
| Knowledge 3 | Does taking part in a clinical trial mean you might not receive the treatment being tested?                                                                                            |
| Knowledge 4 | Do you agree or disagree with the following statement? In a clinical trial, the sponsor pays for the new drug being tested while all other costs are billed to your insurance company. |
| Attitude 5  | Have you ever participated in a clinical trial?                                                                                                                                        |
| Attitude 6  | Has anyone you know taken part in a clinical trial?                                                                                                                                    |
| Attitude 7  | If you had cancer and were asked to be in a cancer clinical trial, would you take part?                                                                                                |
| Attitude 8  | If you had cancer and were offered a cancer clinical trial, would you take part if it meant you needed to leave Guam for treatment?                                                    |
| Attitude 9  | If you had cancer, would you prefer to take part in a cancer clinical trial offered in Guam rather than going off island for the same treatment?                                       |
| Attitude 10 | If you had cancer, do you believe you would benefit by taking part in a clinical trial in Guam?                                                                                        |
| Attitude 11 | If you had cancer, would you take part in a clinical trial if you believed it would help other people in your community?                                                               |
| Attitude 12 | If you had cancer, would you take part in a clinical trial if you believed it would lead to new treatments for cancer?                                                                 |
| Attitude 13 | Do you think you would receive good quality treatment from a clinical trial offered in Guam?                                                                                           |
| Attitude 14 | Do you think that people who take part in cancer clinical trials are treated like 'guinea pigs'?                                                                                       |
| Attitude 15 | Would the possibility of serious side effects stop you from taking part in a clinical trial?                                                                                           |
| Attitude 16 | Do you think your health insurance would cover you if you took part in a clinical trial in Guam?                                                                                       |
| Attitude 17 | Do you think you would have to pay more out-of-pocket expenses if you took part in a clinical trial in Guam?                                                                           |
| Attitude 18 | If you had cancer, would you want your doctor to offer you a clinical trial in Guam?                                                                                                   |
| Attitude 19 | If you had cancer, would you be willing to change doctors in order to take part in a clinical trial in Guam?                                                                           |
| Attitude 20 | If you had cancer, would the doctor's ethnicity be important in your decision to take part in a cancer clinical trial?                                                                 |
| Attitude 21 | Would you be willing to take part in a cancer clinical trial if the doctor was not your ethnicity?                                                                                     |
| Attitude 22 | If your doctor gave you advice that goes against your cultural beliefs, would you listen to them?                                                                                      |
| Attitude 23 | Do you trust western medicine?                                                                                                                                                         |
| Attitude 24 | How important is having the emotional support of your family or social group in your decision to take part in a cancer clinical trial?                                                 |
| Attitude 25 | How important is the support of your religious community if you decided to take part in a cancer clinical trial?                                                                       |
| Attitude 26 | If you had cancer, would you seek traditional healing practices?                                                                                                                       |
| Attitude 27 | Have you ever gone to a <i>suruhano</i> for health care?                                                                                                                               |
| Attitude 28 | Can a <i>suruhano</i> treat cancer?                                                                                                                                                    |
| Attitude 29 | If you had cancer, would you seek treatment by a <i>suruhano</i> ?                                                                                                                     |
| Attitude 30 | Do you believe cancer is caused by <i>taotaomo'na</i> (ancient spirits)?                                                                                                               |
| Attitude 31 | Do you trust traditional medicine?                                                                                                                                                     |
